# Supplementary material for: A homo-chiral helical coordination polymer constructed from an achiral ligand with excellent photo-physical properties and cell imaging application
Source: Royal Society of Chemistry journal article supplement (doi:10.1039/c9nj03791h), 2019-01-01
Supplement: c9nj03791h1.pdf [file c9nj03791h1.pdf]

## Electronic supplementary information

### **Homo-chiral helical coordination polymer constructed by achiral ligand with excellent photo-physical properties and cell imaging application**

Xiaofan Ma,<sup>a</sup> Weili Kong,<sup>b</sup> Maierhaba Abudoureheman,<sup>c</sup> Jun Zhang,<sup>a,b</sup> \* Xiaopeng Xuan<sup>a</sup> \*

*<sup>a</sup> School of Chemistry and Chemical Engineering, Key Laboratory of Green Chemical Media and Reactions, Ministry of Education, Collaborative Innovation Center of Henan Province for Green Manufacturing of Fine Chemicals, Henan Normal University, Xixiang, Henan 453007, P. R. China*

*<sup>b</sup> School of Materials and Chemical Engineering, Anhui Jianzhu University, Hefei 230601, P. R. China.*

*<sup>c</sup> College of Chemistry and Chemical Engineering, Xinjiang University, Urumqi 830046, P. R. China*

**Table S1** Crystallographic data and structural refinement data for polymer **1**.

| Crystal data for polymer <b>1</b> |                                                                   |         |   |
|-----------------------------------|-------------------------------------------------------------------|---------|---|
| Empirical formula                 | C <sub>20</sub> H <sub>16</sub> C <sub>12</sub> N <sub>2</sub> Zn |         |   |
| Formula weight                    | 420.62                                                            |         |   |
| Temperature                       | 296(2)                                                            |         |   |
| Wavelength                        | 0.71073 Å                                                         |         |   |
| Crystal system                    | Tetragonal                                                        |         |   |
| Space group                       | P4(3)2(1)2                                                        |         |   |
| Unit cell dimensions              | a = 8.7877(6) Å                                                   | α = 90° | □ |
|                                   | b = 8.7877(6) Å                                                   | β = 90° | □ |
|                                   | c = 24.203(3) Å                                                   | γ = 90° | □ |
| Volume                            | 1869.1(3) Å <sup>3</sup>                                          |         |   |
| Z                                 | 4                                                                 |         |   |
| Density (calculated)              | 1.495 Mg/m <sup>3</sup>                                           |         |   |
| Absorption coefficient            | 1.604 mm <sup>-1</sup>                                            |         |   |
| F(000)                            | 856                                                               |         |   |
| Crystal size                      | 0.31 x 0.28 x 0.19 mm <sup>3</sup>                                |         |   |
| Theta range for data collection   | 2.47 to 26.43°                                                    |         |   |
| Index ranges                      | -10 ≤ h ≤ 9, -10 ≤ k ≤ 7, -29 ≤ l ≤ 21                            |         |   |
| Reflections collected             | 1743                                                              |         |   |
| Independent reflections           | 0.0302                                                            |         |   |
| Completeness to theta = 25.48°    | 99.58%                                                            |         |   |
| Absorption correction             | Semi-empirical from equivalents                                   |         |   |
| Refinement method                 | Full-matrix least-squares on F <sup>2</sup>                       |         |   |
| Data / restraints / parameters    | 1743 / 0 / 115                                                    |         |   |
| Goodness-of-fit on F <sup>2</sup> | 1.107                                                             |         |   |
| Final R indices [I > 2σ(I)]       | R1 = 0.0226, wR2 = 0.0578                                         |         |   |
| R indices (all data)              | R1 = 0.0245, wR2 = 0.0585                                         |         |   |
| Extinction coefficient            | 0.049                                                             |         |   |
| Largest diff. peak and hole       | 0.256 and -0.166 e.Å <sup>-3</sup>                                |         |   |
| Flack                             | 0.013(7)                                                          |         |   |

$$[a] R_1 = \frac{\sum ||F_o| - |F_c||}{\sum |F_o|}; wR_2 = \left[ \frac{\sum w(F_o^2 - F_c^2)^2}{\sum w(F_o^2)^2} \right]^{1/2}$$

**Table S2** Selected bond lengths [Å] and angles [°] for polymer **1**.

| Bond lengths |            |
|--------------|------------|
| Zn1—N1       | 2.0425(18) |
| Zn1—N1#1     | 2.0425(18) |
| Zn1—Cl1      | 2.2148(6)  |
| Zn1—Cl1#2    | 2.2148(7)  |

  

| Angles         |            |
|----------------|------------|
| N1—Zn1—N1#1    | 110.98(11) |
| N1—Zn1—Cl1     | 105.15(6)  |
| N1—Zn1—Cl1#2   | 106.28(5)  |
| N1#1—Zn1—Cl1   | 106.28(5)  |
| N1#1—Zn1—Cl1#2 | 105.15(6)  |
| Cl1—Zn1—Cl1#2  | 122.89(4)  |

Symmetry transformations used to generate equivalent atoms:

#1-1+y,1+x,1-z #2 -1+y,1+x,1-z

**Table S3** Hydrogen bonding data for polymer **1**

| D-H...A      | d(D-H) (Å) | d(H...A) (Å) | d(D...A) (Å) |
|--------------|------------|--------------|--------------|
| C4-H4...Cl1# | 0.93       | 2.83         | 3.451(3)     |

Symmetry transformations used to generate equivalent atoms:

#x, -1+y, z

**Table S4** The torsion angle for **1**

| <b>1</b>     |           |                |           |
|--------------|-----------|----------------|-----------|
| Zn1-N1-C1-C2 | -179.1(3) | C4-C3-C6-C7    | 12.0(5)   |
| Zn1-N1-C5-C4 | 178.6(2)  | C5-N1-C1-C2    | -1.5(5)   |
| N1-C1-C2-C3  | 0.5(5)    | C6-C3-C4-C5    | 177.0(3)  |
| C1-N1-C5-C4  | 1.0(4)    | C6-C7-C9-C8    | 12.8(4)   |
| C1-C2-C3-C4  | 1.0(5)    | C6-C7-C9-C10   | -167.2(3) |
| C1-C2-C3-C6  | -177.6(3) | C7-C9-C10-C11  | 179.2(2)  |
| C2-C3-C4-C5  | -1.5(4)   | C8-C9-C10-C11  | -0.8(4)   |
| C2-C3-C6-C7  | -169.6(3) | C9-C8-C9-C7    | -179.6(3) |
| C3-C4-C5-N1  | 0.6(5)    | C9-C8-C9-C10   | 0.4(2)    |
| C3-C6-C7-C9  | -177.3(3) | C9-C10-C11-C10 | 0.4(2)    |

**Table S5** The dihedral angle between the various sides in the polymer **1**.

| <b>dihedral angle<br/>(°)</b> | <b>Polymer 1</b> |
|-------------------------------|------------------|
| <b>P1-M</b>                   | 11.84            |
| <b>M-P2</b>                   | 12.78            |
| <b>P1-P2</b>                  | 24.62            |
| <b>P2-N</b>                   | 11.84            |
| <b>N-P3</b>                   | 12.78            |
| <b>P2-P3</b>                  | 24.62            |

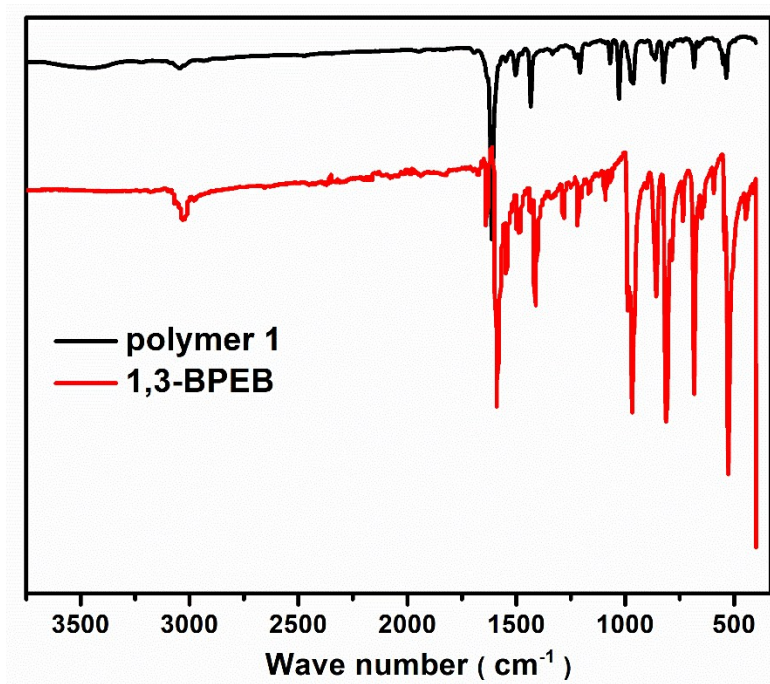

**Fig. S1** The IR spectra of polymer **1** and ligand (1,3-BPEB) in solid state.

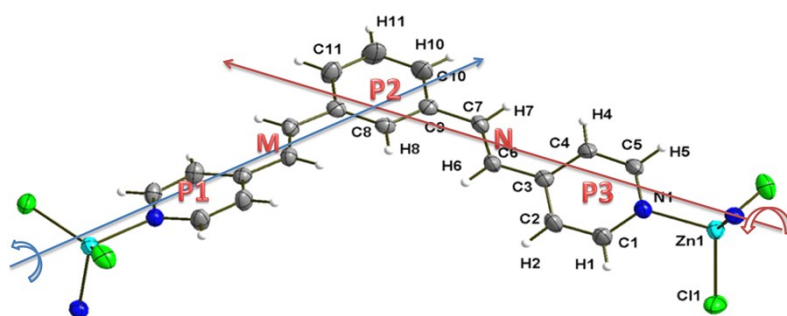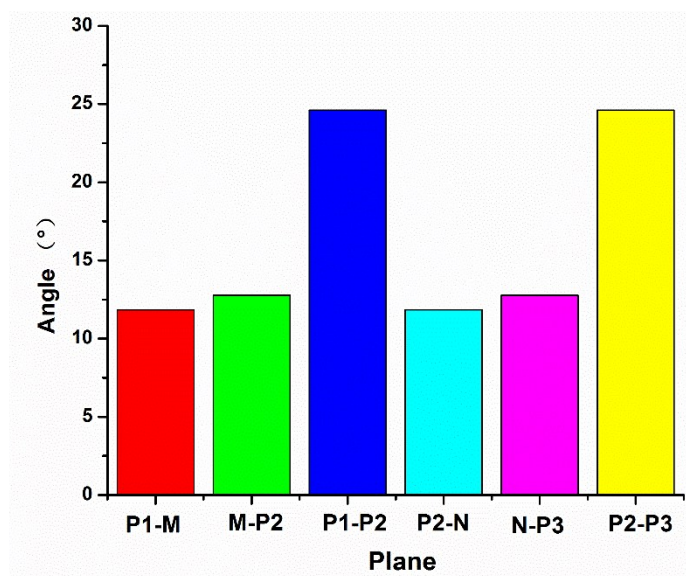

**Fig. S2** The dihedral angles between the various planes in the polymer **1**.
